# Supplementary material for: Gene Therapy Corrects Brain and Behavioral Pathologies in CLN6-Batten Disease
Source: PubMed Central journal article supplement — Mol Ther. 2019 Jul 10;27(10):1836–47. doi: 10.1016/j.ymthe.2019.06.015 (PMC6822284; doi:10.1016/j.ymthe.2019.06.015), 2019-07-10
Supplement: mmc1.pdf [file mmc1.pdf]

## **Supplemental Information**

### **Gene Therapy Corrects Brain and Behavioral Pathologies in CLN6-Batten Disease**

**Jacob T. Cain, Shibi Likhite, Katherine A. White, Derek J. Timm, Samantha S. Davis, Tyler B. Johnson, Cassandra N. Dennys-Rivers, Federica Rinaldi, Dario Motti, Sarah Corcoran, Pablo Morales, Christopher Pierson, Stephanie M. Hughes, Stella Y. Lee, Brian K. Kaspar, Kathrin Meyer, and Jill M. Weimer**

**A**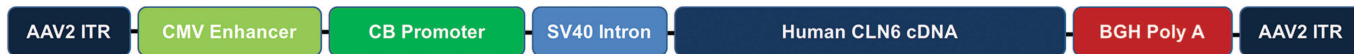**B**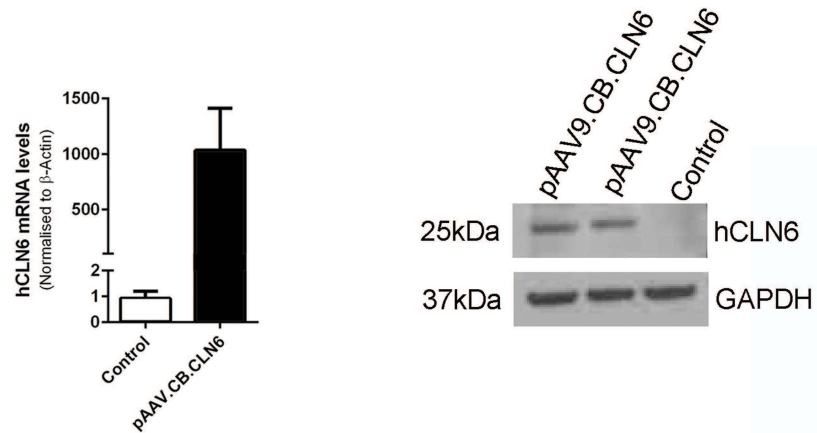**C**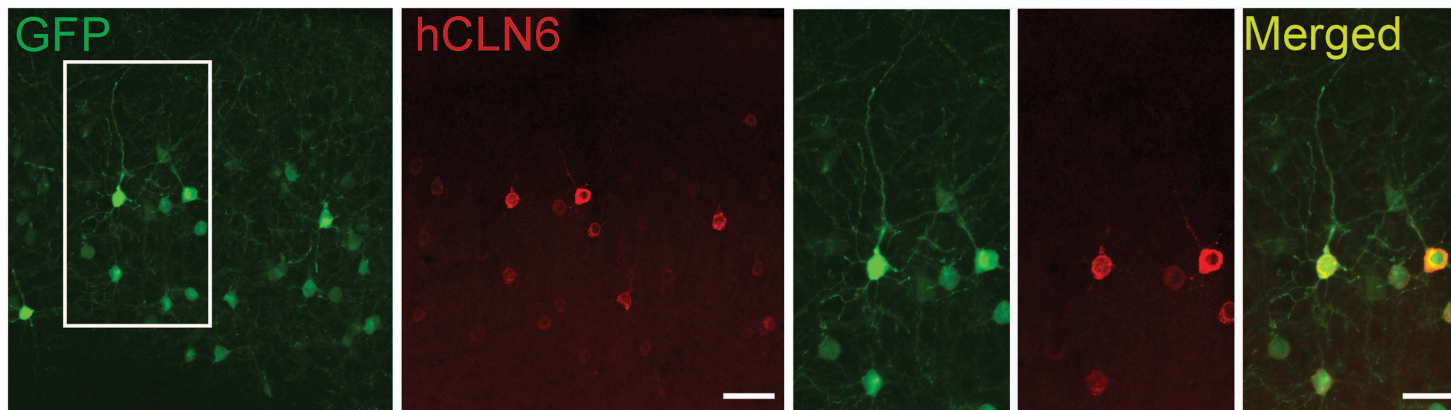

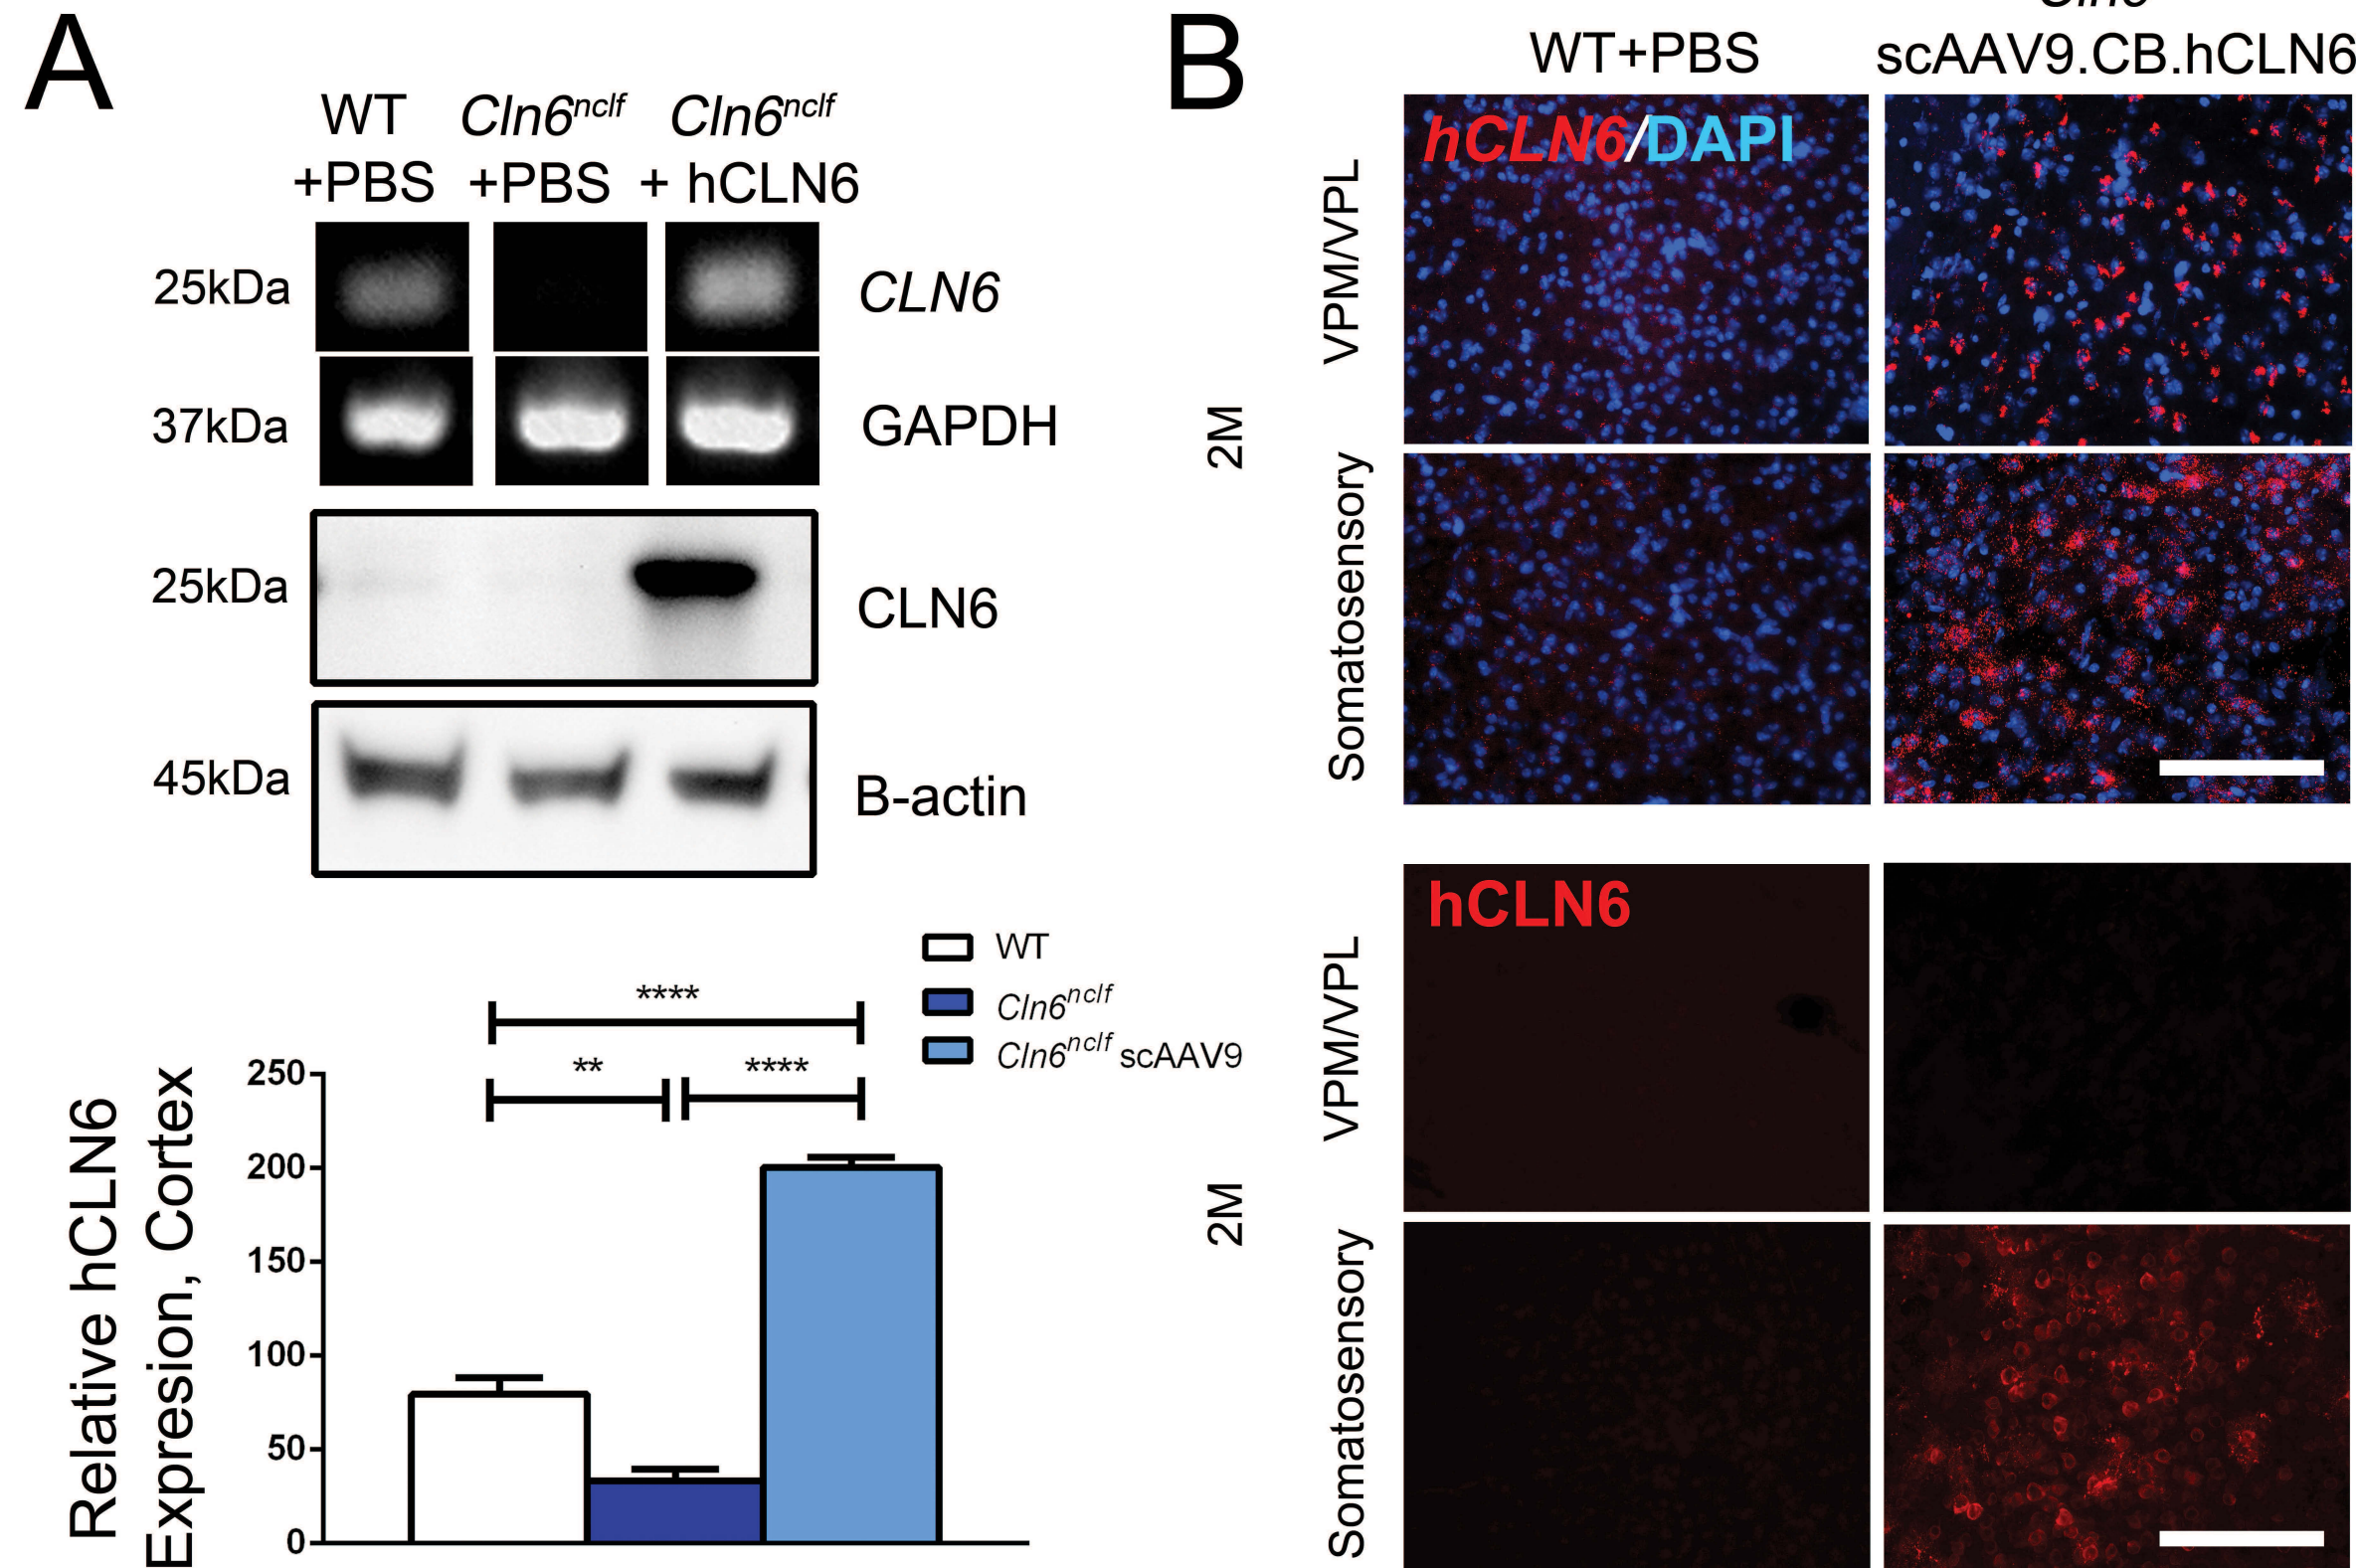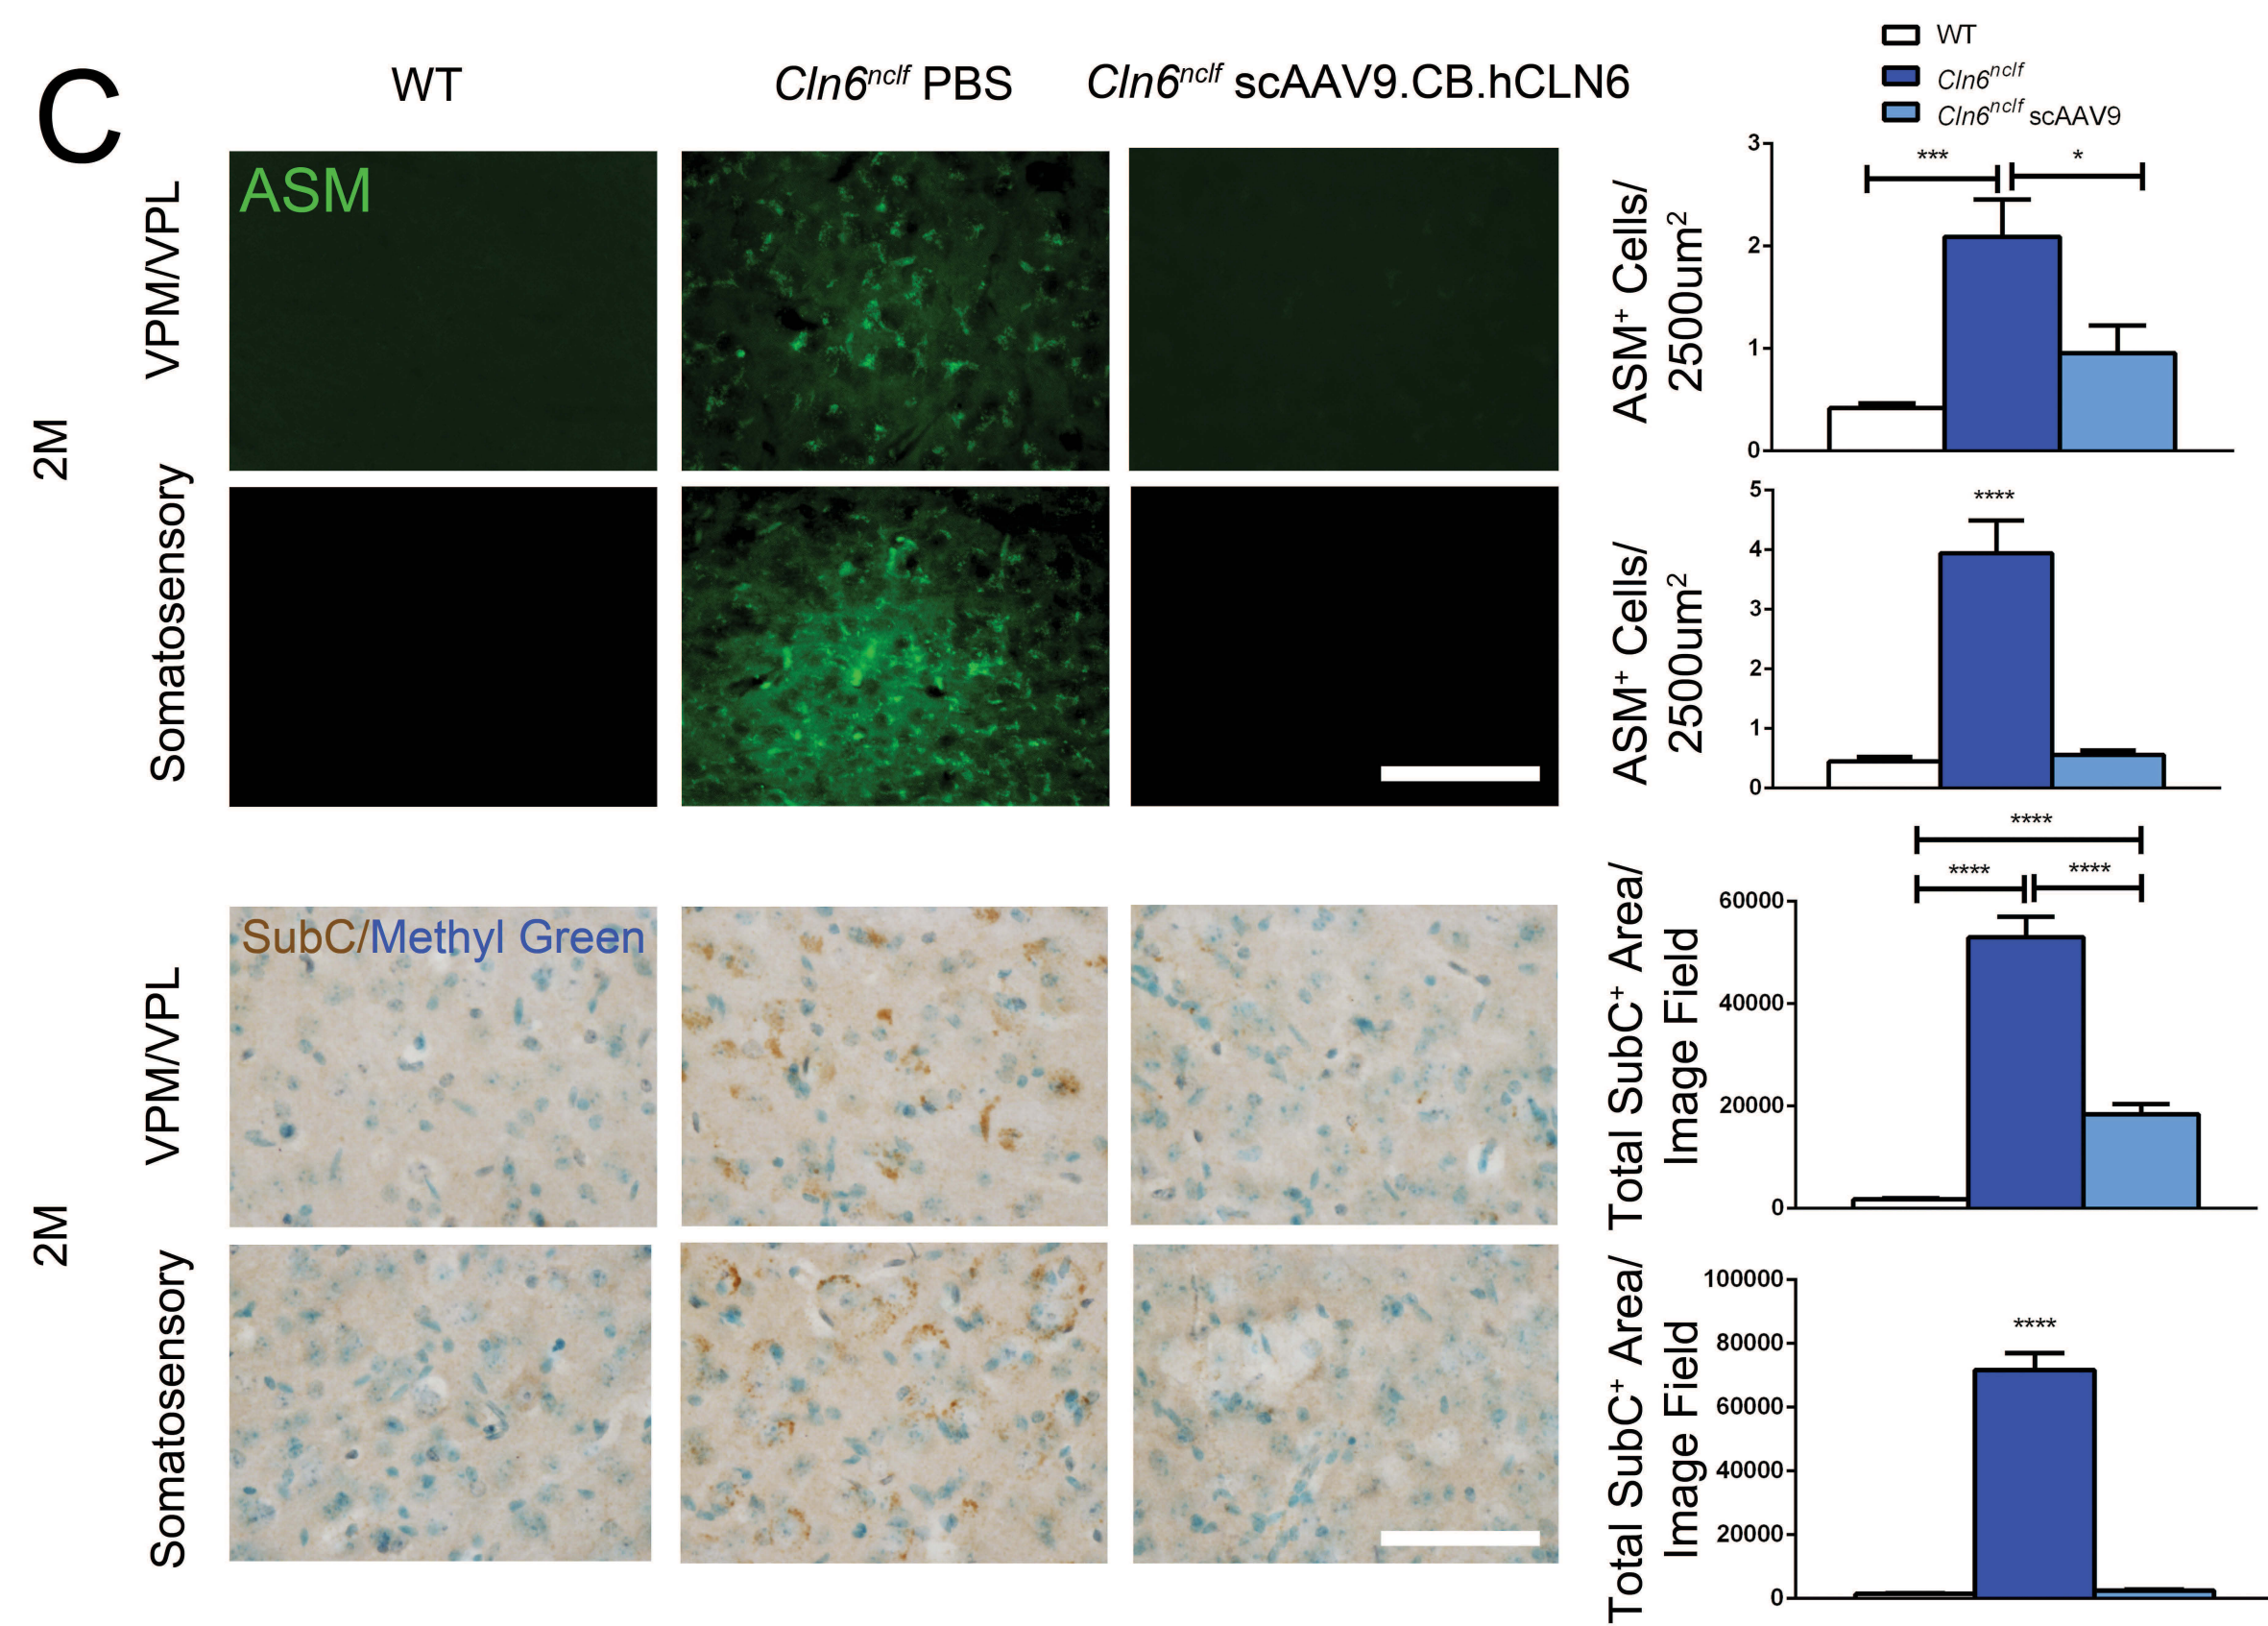

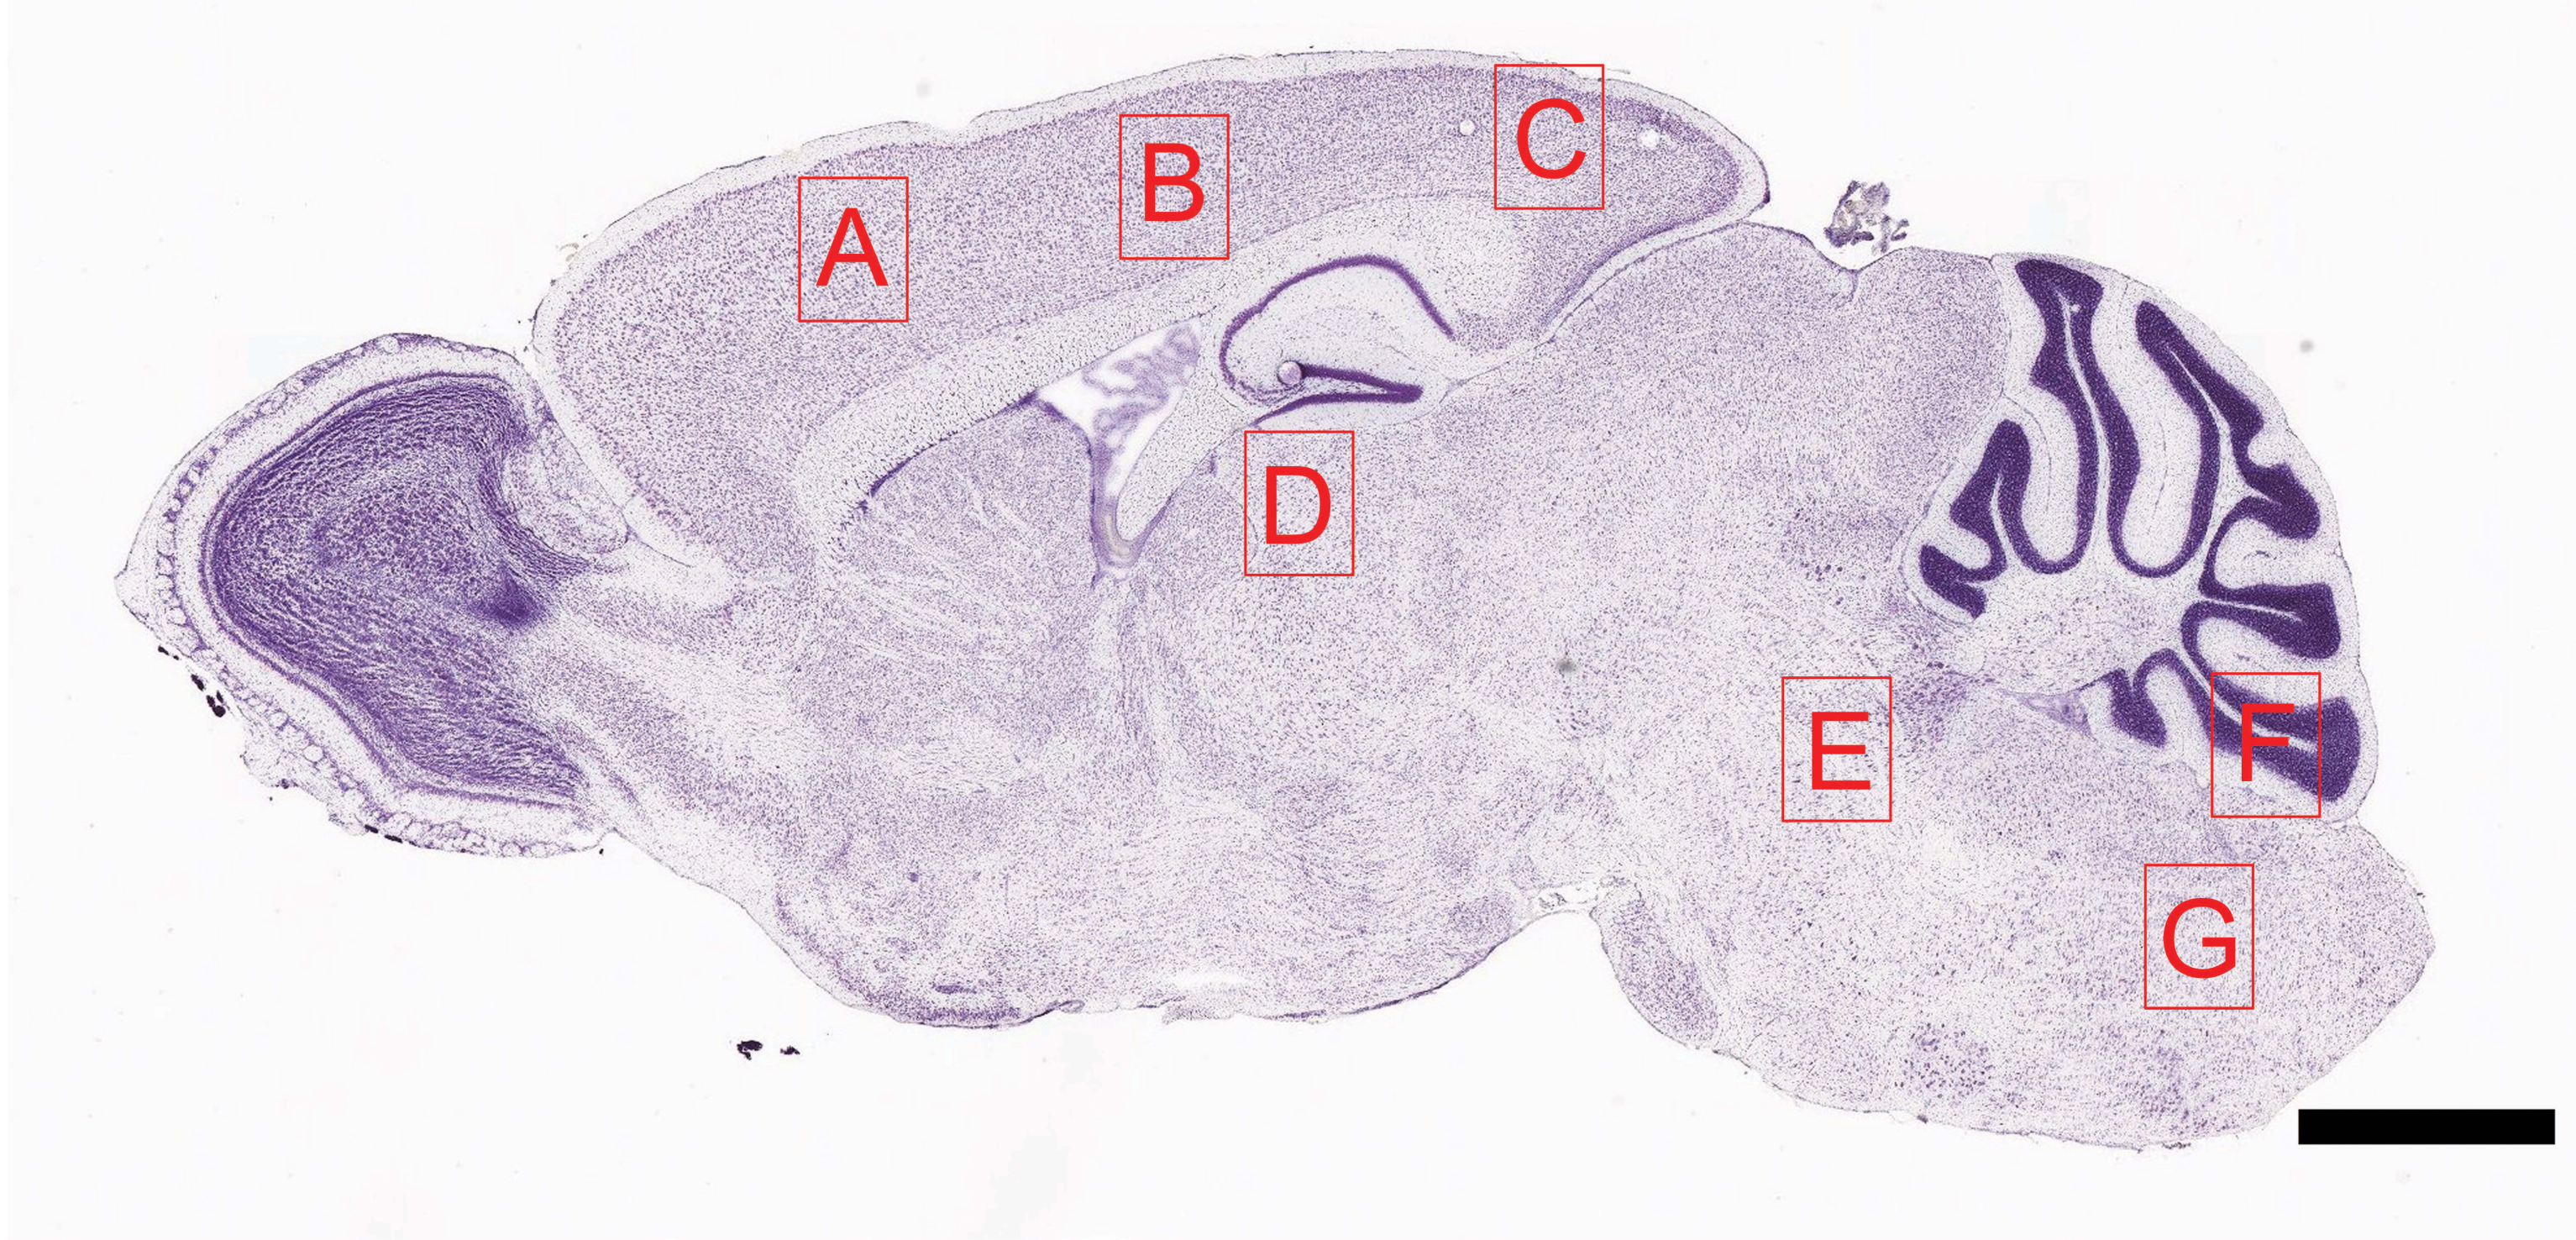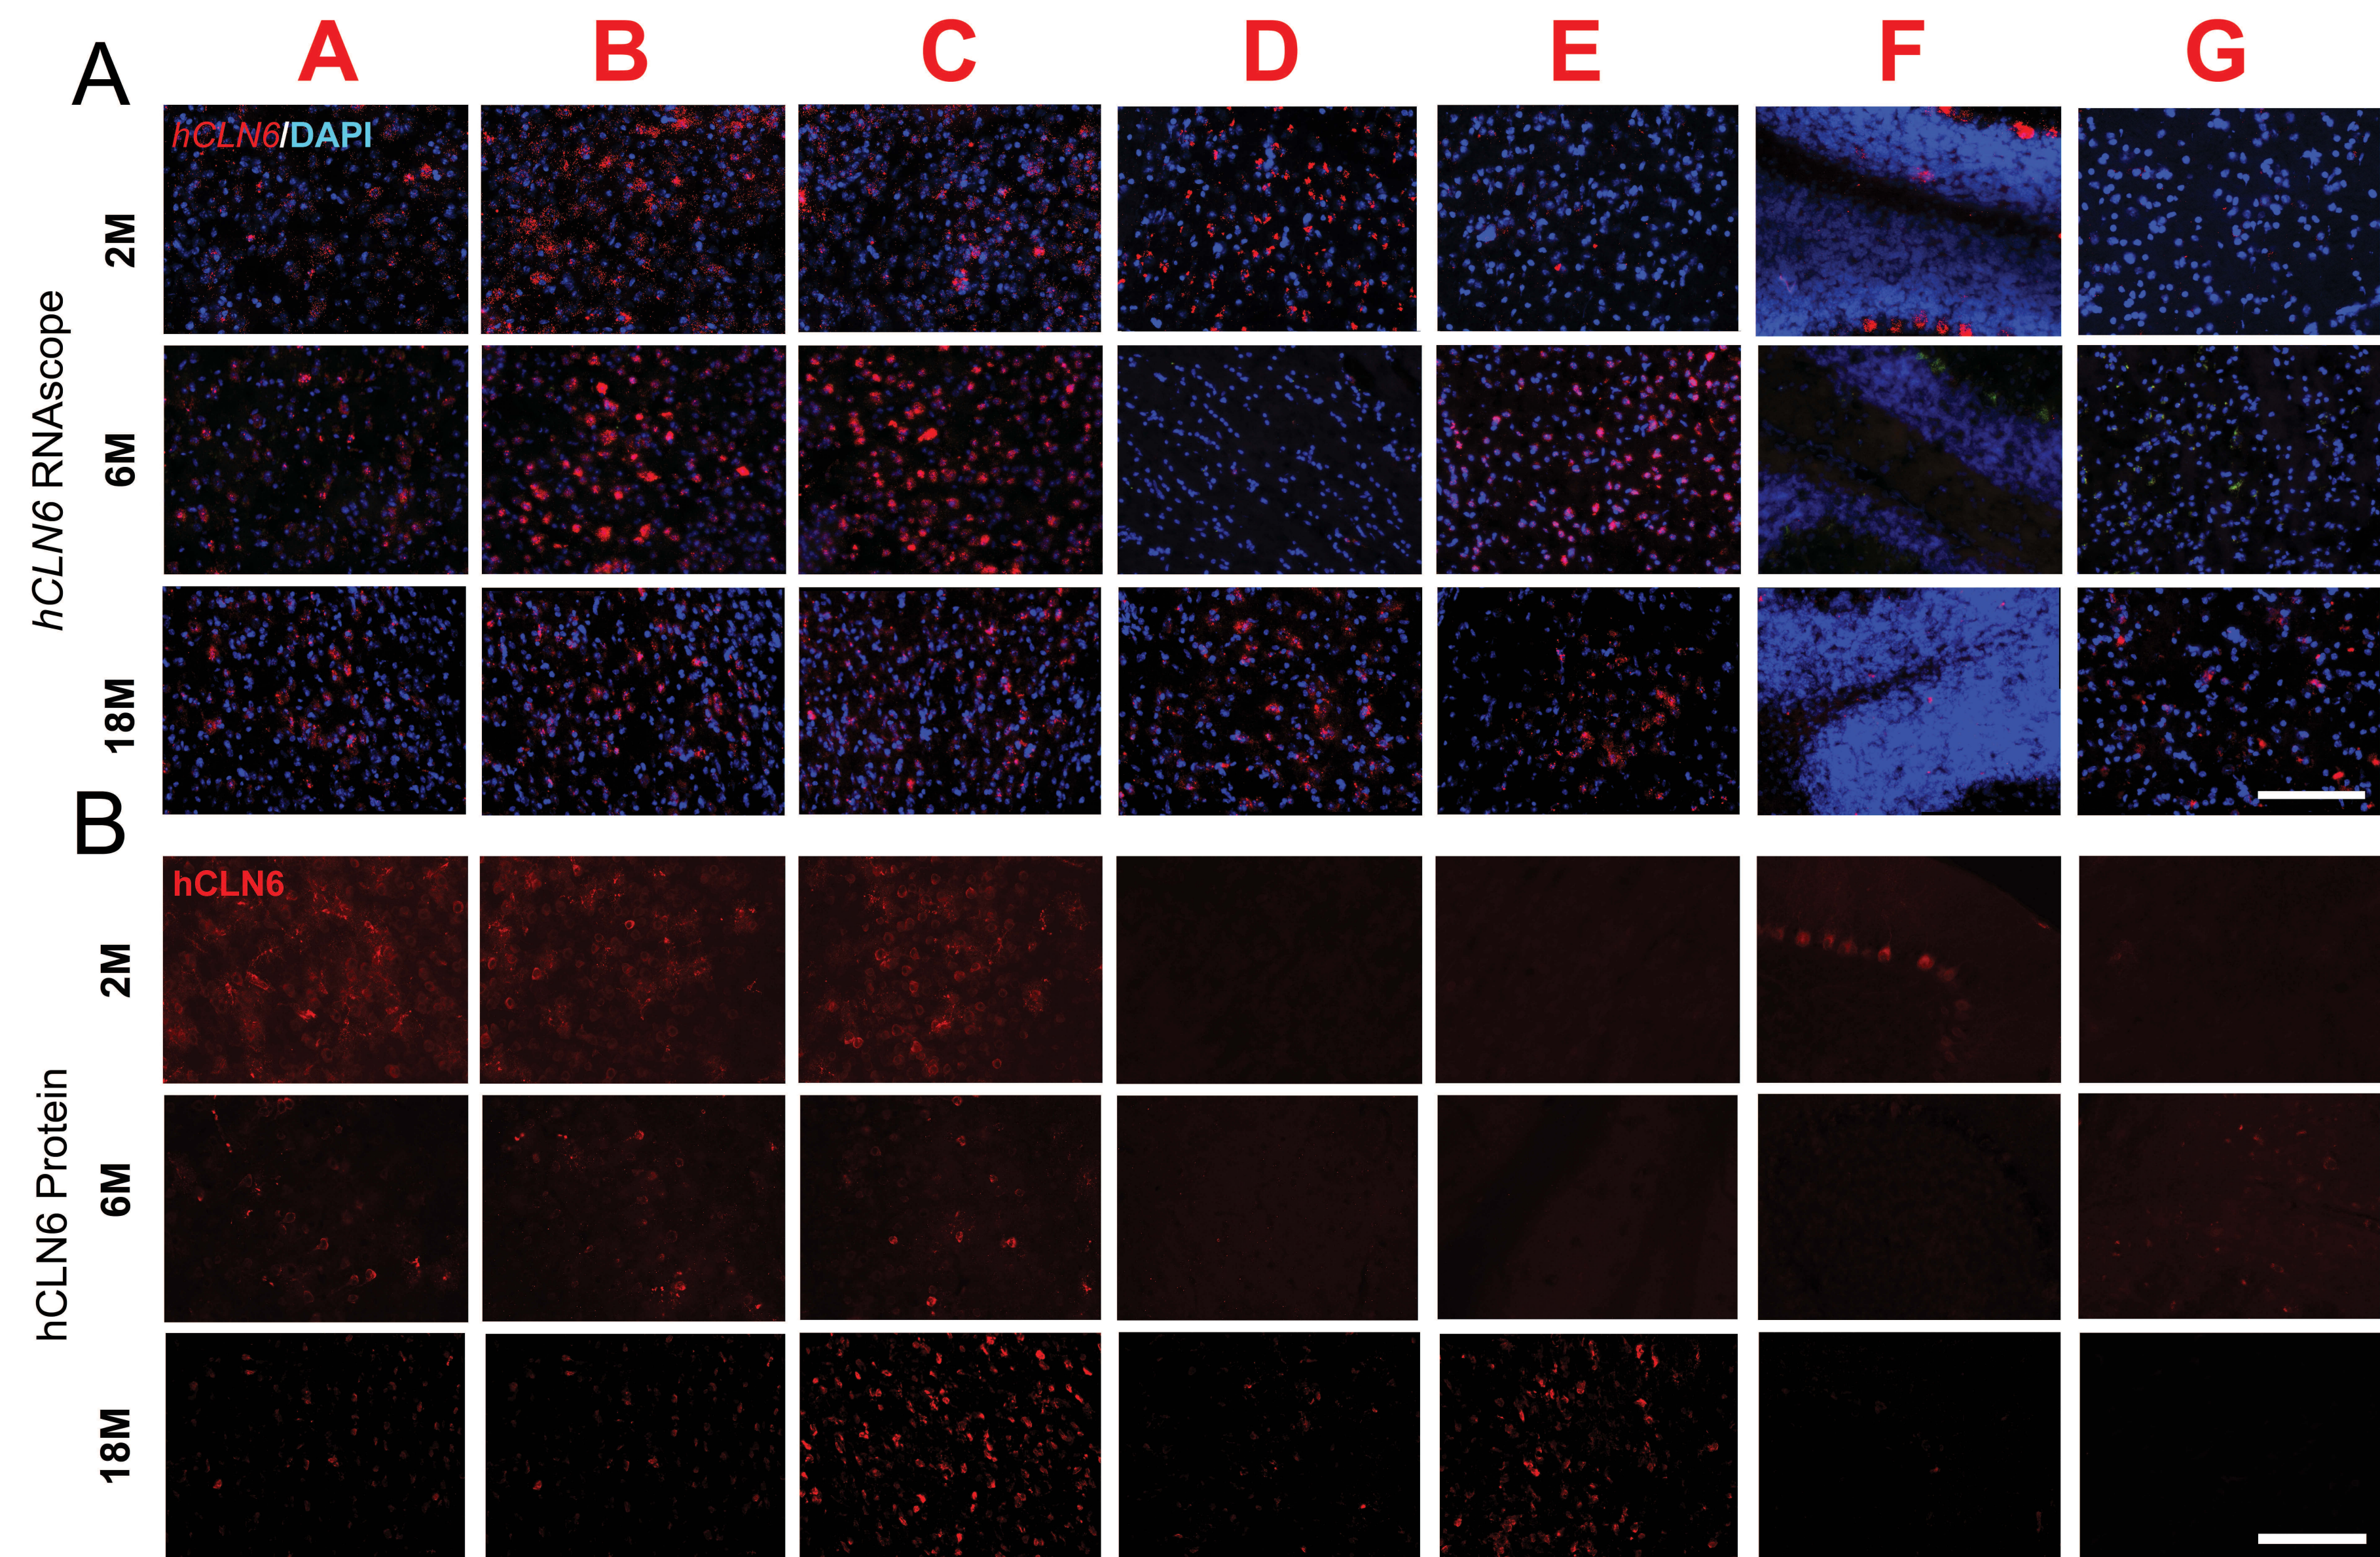

DAPI

WT

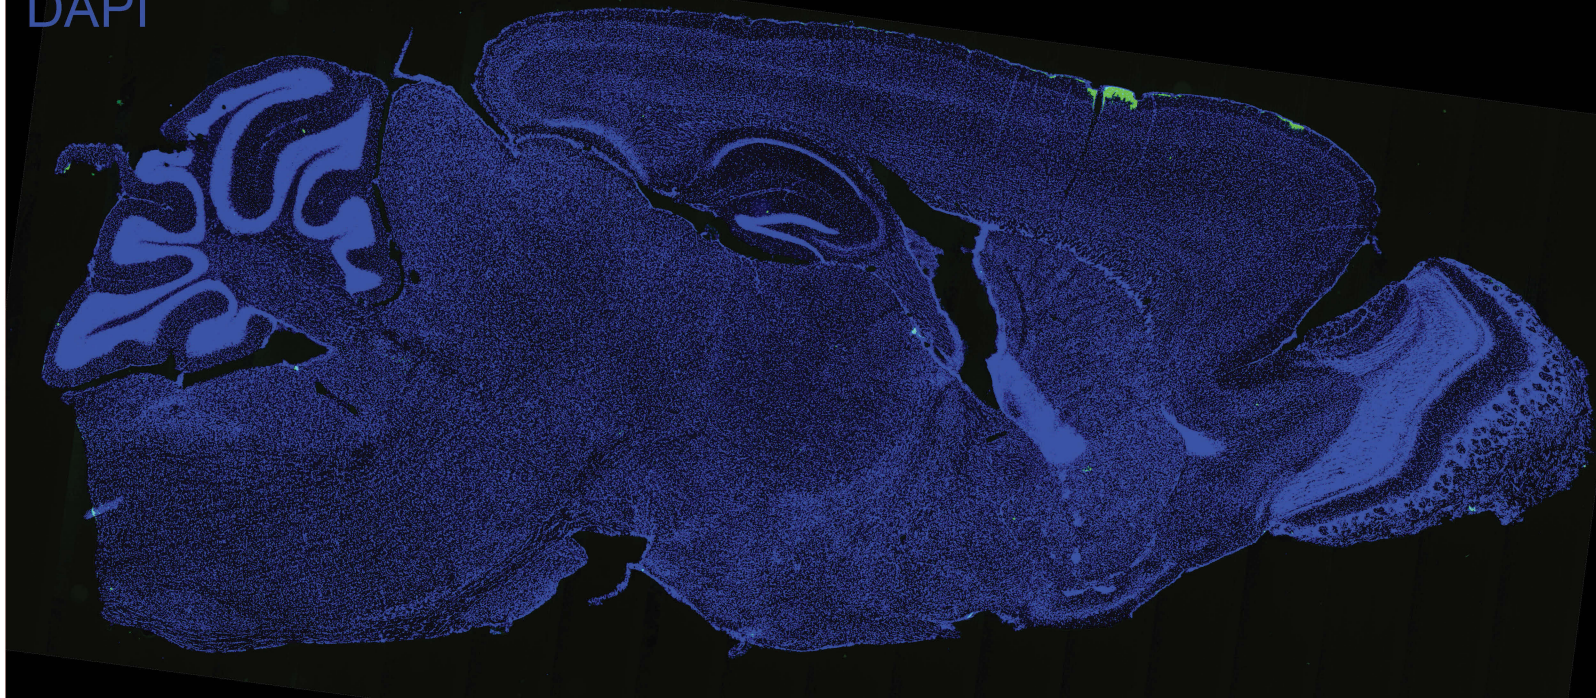

DAPI/hCLN6

*Cln6<sup>nc/f</sup>* AAV9

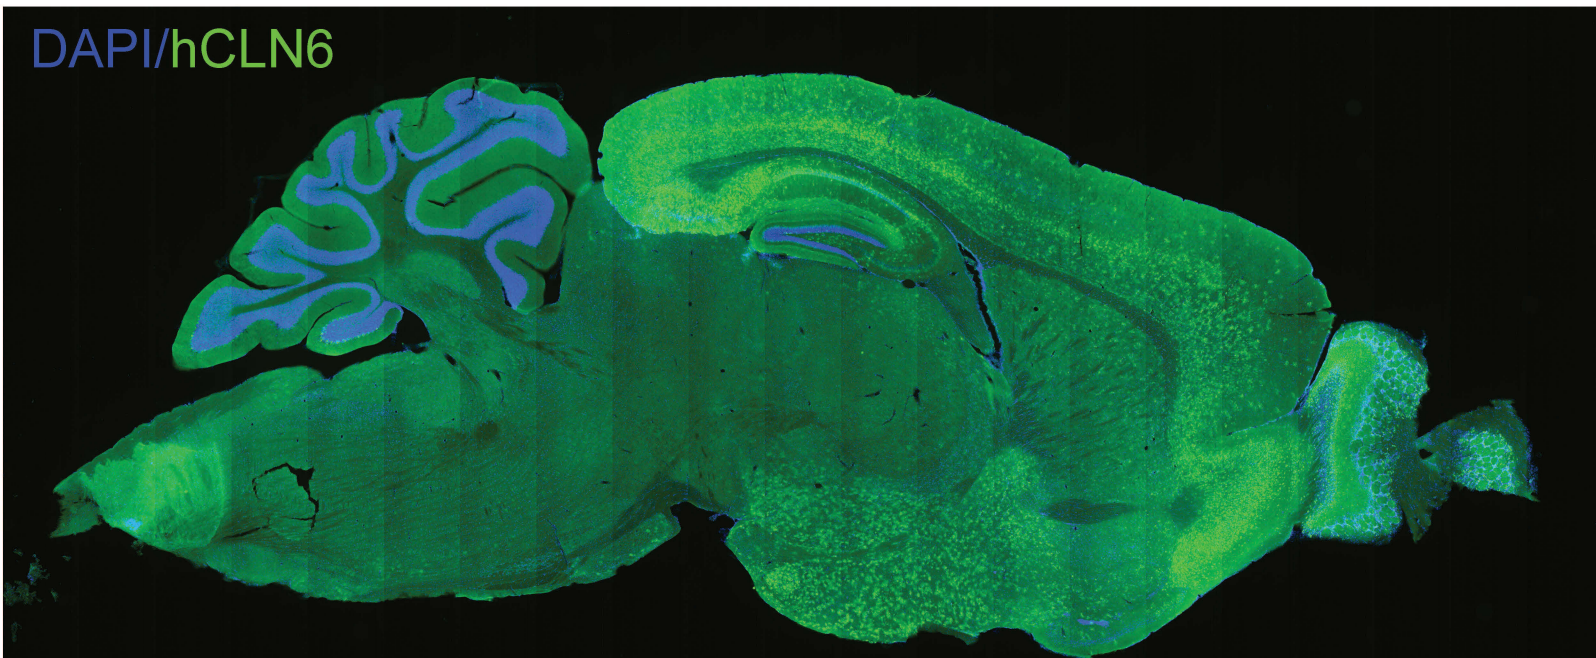

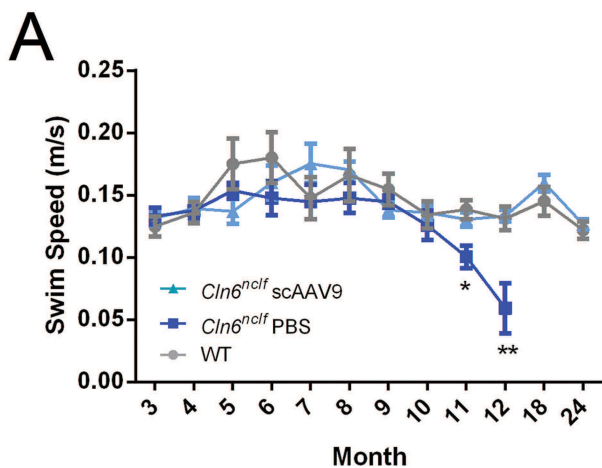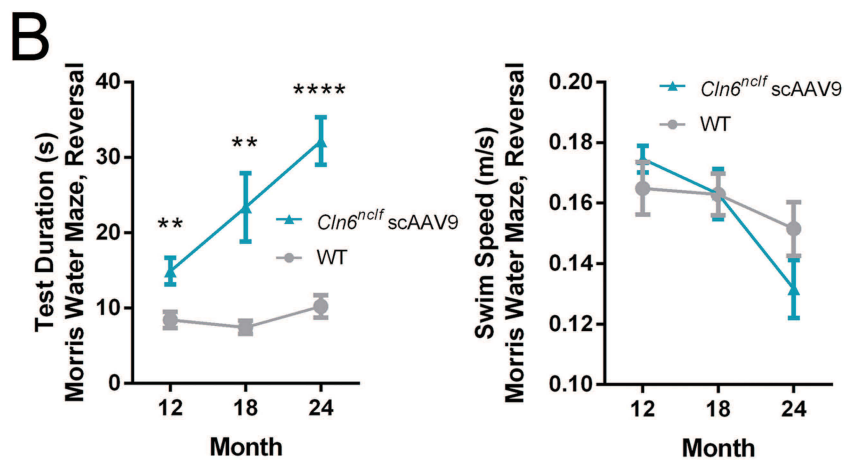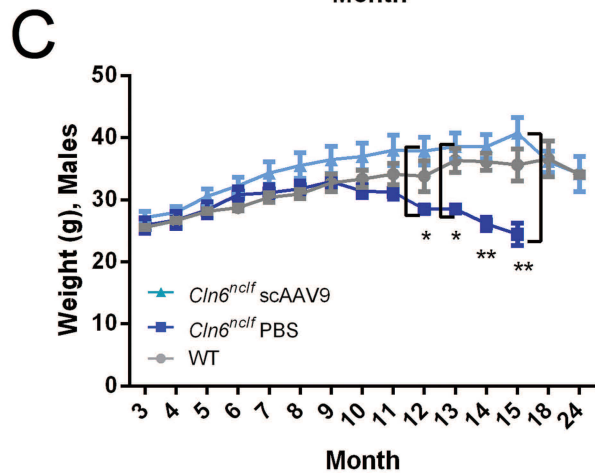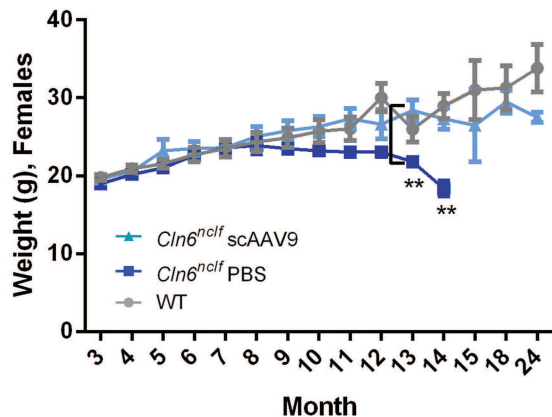

## Figure Legends:

**Figure S1: scAAV9.CB.CLN6 construct induces robust expression of *hCLN6* in vitro and targets the CNS in vivo.** (A) Design of the pscAAV9.CB.CLN6 plasmid construct, with CMV enhancer and chicken- $\beta$ -actin promoter. Self-complementary AAV9.CB.CLN6 was produced by transient transfection procedures using a double-stranded AAV2-ITR-based CB-CLN6 vector, with a plasmid encoding Rep2Cap9 sequence. (B) Transient transfection of HEK293 cells confirms *hCLN6* RNA and protein expression (25kDa). (C) *In utero* electroporation of pscAAV9.CB.CLN6 and pscAAV9.CB.GFP plasmids followed by immunohistochemical staining confirms proper neuronal trafficking and expression of hCLN6 protein on a cellular basis. Electroporation utilized embryonic day 15.5 animals to target excitatory cortical neurons specifically.

## Figure S2: Effect of a single scAAV9.CB.CLN6 injection in 2 month old *Cln6* mutant animals.

(A): Representative RT-PCR gels and densitometry (normalized to a *GAPDH*) shows increased *hCLN6* gene expression (25kDa) in 2 month old animals following scAAV9.CB.CLN6 delivery (ICV, postnatal day 1 (P1),  $5 \times 10^{10}$  vg/animal) compared to PBS-injected *Cln6<sup>necl</sup>* mice. Probed by western blotting, ICV delivery of the scAAV9.CB.CLN6 vector (P1,  $5 \times 10^{10}$  vg/animal) shows a marked increase in hCLN6 protein expression (25 kDa) in 2 month *Cln6<sup>necl</sup>* mice. Gene expression represented in the graph. Mean  $\pm$  SEM. N=3-9 animals/treatment groups. One-Way ANOVA, Bonferroni correction. \* $p < 0.05$ , \*\* $p < 0.01$ , \*\*\* $p < 0.001$ , \*\*\*\* $p < 0.0001$ . (B) *Top*: Representative images of RNAscope analysis confirms widespread transduction of *hCLN6* mRNA in the brain of 2 month scAAV9.CB.CLN6-injected *Cln6<sup>necl</sup>* mice vector (ICV, P1,  $5 \times 10^{10}$  vg/animal). *Bottom*: Representative images of immunohistochemistry using anti-hCLN6 antibodies show protein expression in various brain regions of 2 month old scAAV9.CB.CLN6-injected *Cln6<sup>necl</sup>* mice (ICV, P1,  $5 \times 10^{10}$  vg/animal). Scale bar 50 $\mu$ m (C) *Top*: A single ICV injection of scAAV9.CB.CLN6 at P1 ( $5 \times 10^{10}$  vg/animal) reduces accumulation of autofluorescent storage material (ASM) in the VPM/VPL and somatosensory cortex of 2 month *Cln6<sup>necl</sup>* mice. Mean  $\pm$  SEM, N=3-10 animals/treatment group. One-Way ANOVA, Bonferroni correction. \* $p < 0.05$ , \*\* $p < 0.01$ , \*\*\* $p < 0.001$ , \*\*\*\* $p < 0.0001$ . Scale bar 50 $\mu$ m. *Bottom*: scAAV9.CB.CLN6 injection (ICV, P1,  $5 \times 10^{10}$  vg/animal) prevents the accumulation of mitochondrial ATP synthase subunit C (SubC) in the VPM/VPL and somatosensory cortex of 2 month *Cln6<sup>necl</sup>* mice. Brown immunolabeling represents SubC, while blue stain represents methyl green (nuclei). Mean  $\pm$  SEM, N=21-72 images/treatment group, biological N=3-10 animals/treatment group. One-Way ANOVA, Bonferroni correction. \* $p < 0.05$ , \*\* $p < 0.01$ , \*\*\* $p < 0.001$ , \*\*\*\* $p < 0.0001$ . Scale bar 50 $\mu$ m.

**Figure S3: RNAscope and immunohistochemistry using species-specific hCLN6 RNA probes and antibodies show widespread expression throughout the brain.** (A) *hCLN6* expression throughout the brain, at various time points in scAAV9.CB.CLN6 treated *Cln6<sup>necl</sup>* mice (ICV, P1,  $5 \times 10^{10}$  vg/animal), most notably in the cortex. (B) hCLN6 expression throughout the brain, at various time points in scAAV9.CB.CLN6 treated *Cln6<sup>necl</sup>* mice (ICV, P1,  $5 \times 10^{10}$  vg/animal), most notably in the cortex. (A: motor cortex, B: somatosensory cortex; C: visual cortex; D: thalamus; E: pons; F: cerebellum; G: brainstem) Scale bar 50  $\mu$ m. Sagittal mouse Nissl slice image courtesy of Allen Mouse Brain Reference Atlas <sup>1,2</sup>.

**Figure S4: Overall expression of hCLN6 in treated 2 month old *Cln6* mutant animals.** Widespread immunolabeling of hCLN6 (green) can be visualized throughout the brain, most notably in the cortex, of 2 month old scAAV9.CB.CLN6 treated *Cln6<sup>necl</sup>* animals (ICV, P1,  $5 \times 10^{10}$  vg/animal). DAPI (blue) indicates nuclei dye.

## Figure S5: Additional behavior data in 12-24 month old animals.

(A) Untreated *Cln6<sup>necl</sup>* animals have significantly slower swim speeds at 11 and 12 month of age in the Morris water maze test than either wildtype or treated *Cln6<sup>necl</sup>* counterparts (ICV, P1,  $5 \times 10^{10}$  vg scAAV9.CB.CLN6/animal). (B) scAAV9.CB.CLN6 (ICV, P1,  $5 \times 10^{10}$  vg/animal) does not significantly improve memory and learning deficits of *Cln6<sup>necl</sup>* mice in the Morris water maze reversal task at 12, 18 and 24 months of age when compared to wildtype counterparts. Swim speeds are shown as a control. (C) Male and Female scAAV9.CB.CLN6 treated animals have similar body weights to WT animals. N=5-15 animals/treatment group for water maze assays (panels A-B), N=3-13 animals/treatment group for weight (panel C). One-Way ANOVA or unpaired t-test where appropriate, Mean  $\pm$  SEM. \* $p < 0.05$ , \*\* $p < 0.01$ , \*\*\* $p < 0.001$ , \*\*\*\* $p < 0.0001$

| Group                                 | Sex | Age (months) | Reason for Death                                                         |
|---------------------------------------|-----|--------------|--------------------------------------------------------------------------|
| <b>WT PBS</b>                         | F   | 11           | Found dead                                                               |
|                                       | F   | 17           | Moribund, Ulcerative Dermatitis                                          |
|                                       | F   | 25           | Moribund, Fighting wounds, hunched, broken teeth, BCS 2, rectal bleeding |
|                                       | F   | 25           | NA, censored at end of study                                             |
|                                       | F   | 25           | NA, censored at end of study                                             |
|                                       | F   | 25           | NA, censored at end of study                                             |
|                                       | F   | 29           | NA, censored at end of study                                             |
|                                       | M   | 10           | Moribund, Ulcerative Dermatitis                                          |
|                                       | M   | 18           | Found dead                                                               |
|                                       | M   | 19           | Found dead                                                               |
|                                       | M   | 23           | Moribund                                                                 |
|                                       | M   | 25           | NA, censored at end of study                                             |
|                                       | M   | 28           | Moribund                                                                 |
|                                       | M   | 28           | Moribund                                                                 |
|                                       | M   | 28           | Moribund                                                                 |
| <b><i>Cln6<sup>nc/f</sup></i> PBS</b> | F   | 10           | Moribund, Ulcerative Dermatitis                                          |
|                                       | F   | 13           | Found dead                                                               |
|                                       | F   | 14           | Moribund, Neurologic                                                     |
|                                       | F   | 14           | Moribund, abdominal bleeding and reduced spleen size                     |
|                                       | F   | 14           | Found dead                                                               |
|                                       | F   | 14           | Moribund, Neurologic                                                     |
|                                       | F   | 14           | Moribund, Neurologic                                                     |
|                                       | F   | 14           | Moribund, Neurologic                                                     |
|                                       | F   | 14           | Found dead                                                               |
|                                       | M   | 14           | Moribund, Neurologic                                                     |
|                                       | M   | 14           | Found dead                                                               |
|                                       | M   | 15           | Moribund, Neurologic                                                     |
|                                       | M   | 15           | Moribund, Neurologic                                                     |
|                                       | M   | 15           | Moribund, Neurologic                                                     |
|                                       | M   | 15           | Moribund, abdominal bleeding and reduced spleen size                     |
|                                       | M   | 15           | Moribund, Neurologic                                                     |
|                                       | M   | 15           | Moribund, Neurologic                                                     |



|                                                 |   |    |                                                                                                                   |
|-------------------------------------------------|---|----|-------------------------------------------------------------------------------------------------------------------|
| <b><i>Cln6<sup>nef</sup></i> scAAV9.CB.CLN6</b> | F | 15 | Moribund; Rectal bleeding, anal prolapse; no signs of neurological disorder; spleen enlarged; CBC suggests anemia |
|                                                 | F | 17 | Found dead                                                                                                        |
|                                                 | F | 25 | Moribund, Fighting wounds, hunched, broken teeth, BCS 2, rectal bleeding                                          |
|                                                 | F | 25 | Moribund, Fighting wounds, hunched, broken teeth, BCS 2, rectal bleeding                                          |
|                                                 | M | 15 | Found dead                                                                                                        |
|                                                 | M | 18 | Moribund, Ulcerative Dermatitis                                                                                   |
|                                                 | M | 20 | Moribund, Ulcerative Dermatitis                                                                                   |
|                                                 | M | 23 | Moribund; Orbital Abscess                                                                                         |
|                                                 | M | 24 | Found dead                                                                                                        |
|                                                 | M | 24 | Moribund; Labored Breathing                                                                                       |

**Table S1: Reason for death in mice monitored for survival curve, supplemental for Figure 5.** If animals were deemed moribund per animal staff, the reason for euthanasia is listed (ie, “Moribund, Ulcerative Dermatitis” indicates that the animal was euthanized due to excessive, untreatable ulcerative dermatitis).

**Supplemental References:**

1. Lein, ES, Hawrylycz, MJ, Ao, N, Ayres, M, Bensinger, A, Bernard, A, *et al.* (2007). Genome-wide atlas of gene expression in the adult mouse brain. *Nature* **445**: 168-176.
2. Institute, A (2019). Allen Mouse Brain Atlas, P56, Sagittal, Nissl <http://atlas.brain-map.org/atlas?atlas=2&plate=100883888#atlas=2&plate=100883867&resolution=17.08&x=7687.92687240912&y=3903.8151332310267&zoom=-4>.
